# Supplementary material
Source: publisher site journal article supplement (https://www.dovepress.com/article/451199)
Supplement: Supplementary file 1 [file get_supplementary_file.php]

## ORIGINAL RESEARCH

### Characterizing CD8<sup>+</sup> TEMRA Cells in CP/CPSP Patients: Insights from Targeted Single-cell Transcriptomic and Functional Investigations

Fei Zhang<sup>†</sup>, Qintao Ge<sup>†</sup>, Jialin Meng, Jia Chen, Chaozhao Liang\*, Meng Zhang\*

Department of Urology, the First Affiliated Hospital of Anhui Medical University; Institute of Urology, Anhui Medical University; Anhui Province Key Laboratory of Genitourinary Diseases, Anhui Medical University, Hefei, 230022, P. R. China.

<sup>†</sup>These authors contributed equally to the study.

**\*Corresponding author: Chaozhao Liang (Email: [liang\\_chaozhao@ahmu.edu.cn](mailto:liang_chaozhao@ahmu.edu.cn)).**

**Affiliation:** Department of Urology, The First Affiliated Hospital of Anhui Medical University, Hefei, 230022, P. R. China. **Address:** Jixi Road 218, Shushan District, Hefei City 230022, Anhui Province, People's Republic of China. **Tel./Fax:** +86 55162922034; **Meng Zhang (Email: [zhangmeng1930@126.com](mailto:zhangmeng1930@126.com)).** **Affiliation:** Department of Urology, The First Affiliated Hospital of Anhui Medical University, Hefei, 230022, P. R. China. **Address:** Jixi Road 218, Shushan District, Hefei City 230022, Anhui Province, People's Republic of China. **Tel./Fax:** +86 55162922034.

**Table S1| Conserved markers for the eight cell types.**

| Cell cluster | Gene ID                                                                                                                                                                                                                                                                                                                                                                                                                                                                                                                                                                                                                                                                                                                                                                                                                                                                                                             |
|--------------|---------------------------------------------------------------------------------------------------------------------------------------------------------------------------------------------------------------------------------------------------------------------------------------------------------------------------------------------------------------------------------------------------------------------------------------------------------------------------------------------------------------------------------------------------------------------------------------------------------------------------------------------------------------------------------------------------------------------------------------------------------------------------------------------------------------------------------------------------------------------------------------------------------------------|
| CD8+Naïve T  | CXCR1, CXCL8, NAMPT, ITGAX, VNN2, DUSP1, TLR2, LAT2, IL32, C10orf54, CD52, CD3E, TRBC2, TRAC, CD3D, CD48, GAPDH, SELL, HLA.C, LCK, CCL5, CD6, CD69, CD2, ICAM1, CTSW, NKG7, RUNX3, HLA.DPB1, FYN, PIK3IP1, IL7R, ARL4C, LAT, CD5, TARP-refseq, LGALS1, GIMAP2, IL2RB, ITK, CD8A, DUSP2, TNFRSF1B, GZMH, FOSB, CD44, GZMA, ITGAL, LEF1, JUN, CD7, CD247, APOBEC3G, CST7, SELPLG, CBLB, SPOCK2, KLRK1, PRF1, ITGA4, HLA.DPA1, TNFSF10, CD27, CCR7, GNLY, KLRB1, ZAP70, TSPAN32, GZMB, IER5, CD300A, TRIB2, BAX, IFNGR1, PECAM1, S1PR1, TBX21, BCL6, TCF7, RORA, GIMAP5, NCR3, LAIR2, CXCR3, TNFRSF25, LGALS3, HLA.DRB3, TRAT1, KLRG1, CD4, CD8B, ICOS, IL23R, BCL11B, IL18R1, CD244, IER3, ZNF683, STAT4, STAT1, HLA.DQA1, CCND2, TIAF1, IFNG, CD3G, LTA, CLEC2D, FOXO1, TRDC, ITGAE, GZMK, STAT6, TXK, SLAMF1, DPP4, ANXA5, CNOT2, STAT3, GZMM, CX3CR1, IL6R, PASK, KLRC4, CCL4, CASP3, LAG3, TNF, IL4R, EGR1, CTLA4 |
| CD8+TCM      | LEF1, PIK3IP1, CCL5, CST7, NKG7, CD8B, GZMA, CCR7, GZMH, LGALS1, TARP-refseq, GNLY, SELL, CCR9, CD9, GZMB, PRF1, IFNG, TBX21, IL23R, HLA.DPA1, HLA.DPB1, TGFB3, KLRB1, CCL4, KLRK1, LAG3, FYB, BTLA, CD3E, BTG1, APOBEC3G, CD48, CD300A, CD27, KLRG1, EGR1, IL18RAP, ZNF683, KLRF1, TXK, ANXA5, TNF, SPOCK2, TNFRSF1B, GAPDH, PASK, TIGIT, IL7R, B3GAT1, IER5, KLRC3, LCK, FOXP1, ITK, TRBC2, CD7, IL2RB, ITGAM, TCF7, NCR3, NT5E, IL6R, ARL4C, CXCR4, ITGB2, CD8A, GZMK, RUNX3, IL12A, JUN, FYN, HLA.DRA, CCR2, DUSP4, HLA.DRB3, LAT, CD6, CCL20, CD4, PECAM1, BCL11B, CXCL8, CD244, IL15, HLA.DMA, TSPAN32, FOXP3, IER3, STAT6, CD160, CASP3, RORC, GIMAP2, FOXO1, CCND2, STAT4, CD40LG, NAMPT, TRDC, LAIR2, CTLA4, CD5, CX3CR1, LTA, KLRC4, FAS, BCL2, CXCR3, PRDM1, ITGAX, IFNGR1, NINJ2, SLAMF1, ZAP70, GIMAP5                                                                                                 |
| CD8+TEM      | HLA.DQB1, FOSB, RORA, GZMK, CCL5, CD52, CD4, LEF1, LGALS1, PASK, TRAC, IL12RB2, CCR7, DUSP2, TRBC2, TARP-refseq, LAIR2, SELL, FYB, ZNF683, KLRB1, PIK3IP1,                                                                                                                                                                                                                                                                                                                                                                                                                                                                                                                                                                                                                                                                                                                                                          |

|                       |                                                                                                                                                                                                                                                                                                                                                                                                                                                                                                                                                                                                                                                                                                                                                          |
|-----------------------|----------------------------------------------------------------------------------------------------------------------------------------------------------------------------------------------------------------------------------------------------------------------------------------------------------------------------------------------------------------------------------------------------------------------------------------------------------------------------------------------------------------------------------------------------------------------------------------------------------------------------------------------------------------------------------------------------------------------------------------------------------|
|                       | IL18RAP, GZMB, TRDC, ICOS, ITK, CST7, ZBTB16, TRIB2, LTB, CD5, GNLY, TCF7, HMGB2, IL4R, GZMA, GZMH, IL23R, CD27, CTLA4, CD40LG, ITGAM, CLEC2D, LTA, TNFSF10, IL2RB, VNN2, BCL11B, KLRC3, BCL2, LAG3, ANXA5, HLA.DRB3, B3GAT1, CX3CR1, KLRG1, CD300A, JUN, IL18R1, NCR3, CD160, CCR5, TXK, FOXO1, HLA.DQA1, CBLB, HLA.DRA, CCL4, KLRC1, CCL3                                                                                                                                                                                                                                                                                                                                                                                                              |
| CD8+TEMRA             | GZMB, GZMH, GNLY, PRF1, TBX21, NKG7, TARP-refseq, CST7, CD8A, CTSW, CCL5, RUNX3, BTG1, DUSP1, CD48, LAT, JUNB, CD69, DUSP2, FYB, TRIB2, KLRB1, PIK3IP1, IL23R, IL7R, TNFRSF25, TRAT1, CD4, TCF7, GZMK, LTB, SELL, LEF1, CD27, CCR7, CD3E, PASK, TRBC2, HLA.DPB1, GZMA, CXCR4, LGALS1, ZNF683, GIMAP2, MYC, KLRK1, FOSB, CD7, GIMAP5, ITGAL, TNFSF10, TRAC, ITGAM, ICOS, STAT6, CX3CR1, HLA.DPA1, BCL11B, IL2RB, APOBEC3G, LCK, STAT5A, IL4R, B3GAT1, JUN, ITGAE, CD5, CD300A, ITK, SPOCK2, CD44, TXK, CD6, BAX, CNOT2, CD40LG, CCL4, C10orf54, DPP4, FOXP3, STAT1, KLRC3, BCL2, CCND2, KLRG1, VNN2, HMGB2, IFNG, CTLA4, LAP3, IFNGR1, KLRF1, LTA, LGALS3, SLAMF1, CD244, NAMPT, FOXO1, CHI3L2, KLRC4, LAIR2, IKZF2, HLA.DRB3, HLA.DQA1, TNF, LAG3, EGR1  |
| CD4+TCM               | CD4, LEF1, IL23R, SELL, FYB, IL7R, PIK3IP1, TRBC2, BTG1, TRAC, CD48, HLA.DPB1, HLA.DPA1, KLRG1, TBX21, CCL5, CD8B, GZMA, CTSW, KLRK1, PRF1, TARP-refseq, CST7, CD8A, ZNF683, CCL4, NKG7, GNLY, GZMB, GZMH, CX3CR1, CD300A, CD27, ITGAM, CCR7, CD3E, LGALS1, LAT, APOBEC3G, EGR1, TRIB2, IFNG, CD69, KLRC3, CD6, RUNX3, HLA.DRB3, JUNB, IL2RB, LCK, ITK, TCF7, TRAT1, HLA.DRA, B3GAT1, LTB, CD244, KLRC4, LAG3, TRDC, NCR3, GIMAP2, CD5, PASK, LAIR2, CD44, STAT6, GIMAP5, TNF, HLA.DQA1, TNFRSF25, IL18RAP, BCL11B, CXCR5, ICOS, GZMK, IL4R, SPOCK2, HLA.DQB1, KLRC1, MYC, HLA.DMA, TXK, KLRF1, GZMM, CD7, CD40LG, STAT5A, ARL4C, C10orf54, IL6R, RORA, TNFSF10, CCND2, TIAF1, FOXO1, LTA, LGALS3, CTLA4, FOXP3, CNOT2, STAT1, BCL2, S1PR1, SLAMF1, DPP4 |
| Double negative TEMRA | FOSB, GIMAP2, CD7, IL2RB, HLA.DPA1, CD52, APOBEC3G, CD48, C10orf54, CD3D, GZMA, SELPLG, CD8B, CTSW, IL32,                                                                                                                                                                                                                                                                                                                                                                                                                                                                                                                                                                                                                                                |

|               |                                                                                                                                                                                                                                                                                                                                                                                                                                                                          |
|---------------|--------------------------------------------------------------------------------------------------------------------------------------------------------------------------------------------------------------------------------------------------------------------------------------------------------------------------------------------------------------------------------------------------------------------------------------------------------------------------|
|               | HLA.DPB1, LAT, CD27, TRAT1, GAPDH, RUNX3, CD3E, GZMB, CCL4, CD8A, LGALS1, GZMH, NKG7, CST7, HLA.DRB3, LAIR2, LAG3, TRBC2, TARP-refseq, SPOCK2, CD300A, ZNF683, ICOS, CD244, KLRB1, TRAC, HMGB2, STAT6, CD3G, ZAP70, BTG1, KLRC4, LTA, EGR1, CNOT2, LGALS3, TIAF1, BCL11B, CCR7, STAT3, HLA.DQB1, STAT4, TNFRSF25, VNN2, FAS, CCL5, PASK, CD40LG, GNLY, KLRF1, ITK, TNF, TRDC, CBLB, FOXO1, ITGA4, IFNGR1, IL18RAP, B3GAT1, LEF1, TXK, TNFRSF1B, IL18R1, FYB, CASP3, RORA |
| Doublet TEMRA | DUSP4, FOXP3, CTLA4, IL2RA, IL32, HLA.DRA, ICOS, IKZF2, HLA.DQB1, F5, CCL5, GAPDH, TIGIT, HLA.DRB3, TRIB2, CCR4, NKG7, CTSW, ANXA5, CD4, ARL4C, LAIR2, NINJ2, TNFRSF1B, HLA.DMA, HLA.DQA1, LGALS3, TNFSF10, CD27, CD44, SELL, CD8A, KLRK1, TARP-refseq, SELPLG, FAS, GZMH, CST7, PRDM1, RUNX3, LGALS1, GNLY, FOSB, IRF4, PRF1, PTTG2, GZMA, GZMB, CD300A, IL6R, CXCR3, NCR3, SLAMF1, CCL4, CD244, TBX21, KLRG1, CD8B, IL7R, DPP4, TRDC                                   |

**Note:** TCM, T central memory cell; TEM, T effector memory cell; TEMRA, T effector memory RA cell



**Table S2| Baseline information for enrolled healthy volunteers and CP-LS patients.**

| <b>Variable</b>                  | <b>Overall (n=32)</b> | <b>Healthy control (n=16)</b> | <b>CP-LS (n=16)</b> | <b>Stat</b> | <b>P value</b> |
|----------------------------------|-----------------------|-------------------------------|---------------------|-------------|----------------|
| Age, median [IQR]                | 26.00 [24.00,28.00]   | 26.00 [24.00,27.00]           | 27.00 [25.00,30.00] | -1.04       | 0.304          |
| BMI, median [IQR]                | 23.81 [21.97,24.73]   | 23.85 [22.60,24.54]           | 23.77 [21.46,25.06] | -0.40       | 0.706          |
| Pain score, median [IQR]         | 5.00 [0.00,6.00]      | /                             | 6.00 [5.00,7.00]    | -4.82       | <0.001         |
| NIH-CPSI Score, mean ( $\pm$ SD) | 7.41 $\pm$ 7.49       | /                             | 14.81 $\pm$ 1.55    | -37.01      | <0.001         |

**Note:** CP-LS, chronic prostatitis-like symptoms; IQR, interquartile range; BMI, body mass index; NIH-CPSI, National Institutes of Health Chronic Prostatitis Symptom Index; SD, standard deviation.

**Table S3| Antibodies used in the current study.**

| <b>Antibody</b>                           | <b>Brand name</b> | <b>Item No.</b> |
|-------------------------------------------|-------------------|-----------------|
| FITC Mouse Anti-Human CD45RA (HI100)      | BD Pharmingen     | 555488          |
| PerCP-Cy™5.5 Mouse Anti-Human CD3 (UCHT1) | BD Pharmingen     | 560835          |
| APC anti-human CD197 (CCR7) Clone G043H7  | BioLegend         | 353214          |
| BV605 Mouse Anti-Human CD4(RPA-T4)        | BD Horizon        | 562658          |
| APC-Cy™7 Mouse Anti-Human CD8             | BD Pharmingen     | 557834          |
| BV421 Mouse Anti-Human Perforin (δG9)     | BD Horizon        | 563393          |
| BV510 Mouse Anti-Human Granzyme B(GB11)   | BD Horizon        | 563388          |
| BV786 Mouse Anti-Human IFN-γ(4S.B3)       | BD Horizon        | 563731          |
| PE anti-human TNF-α (MAb11)               | BioLegend         | 502909          |

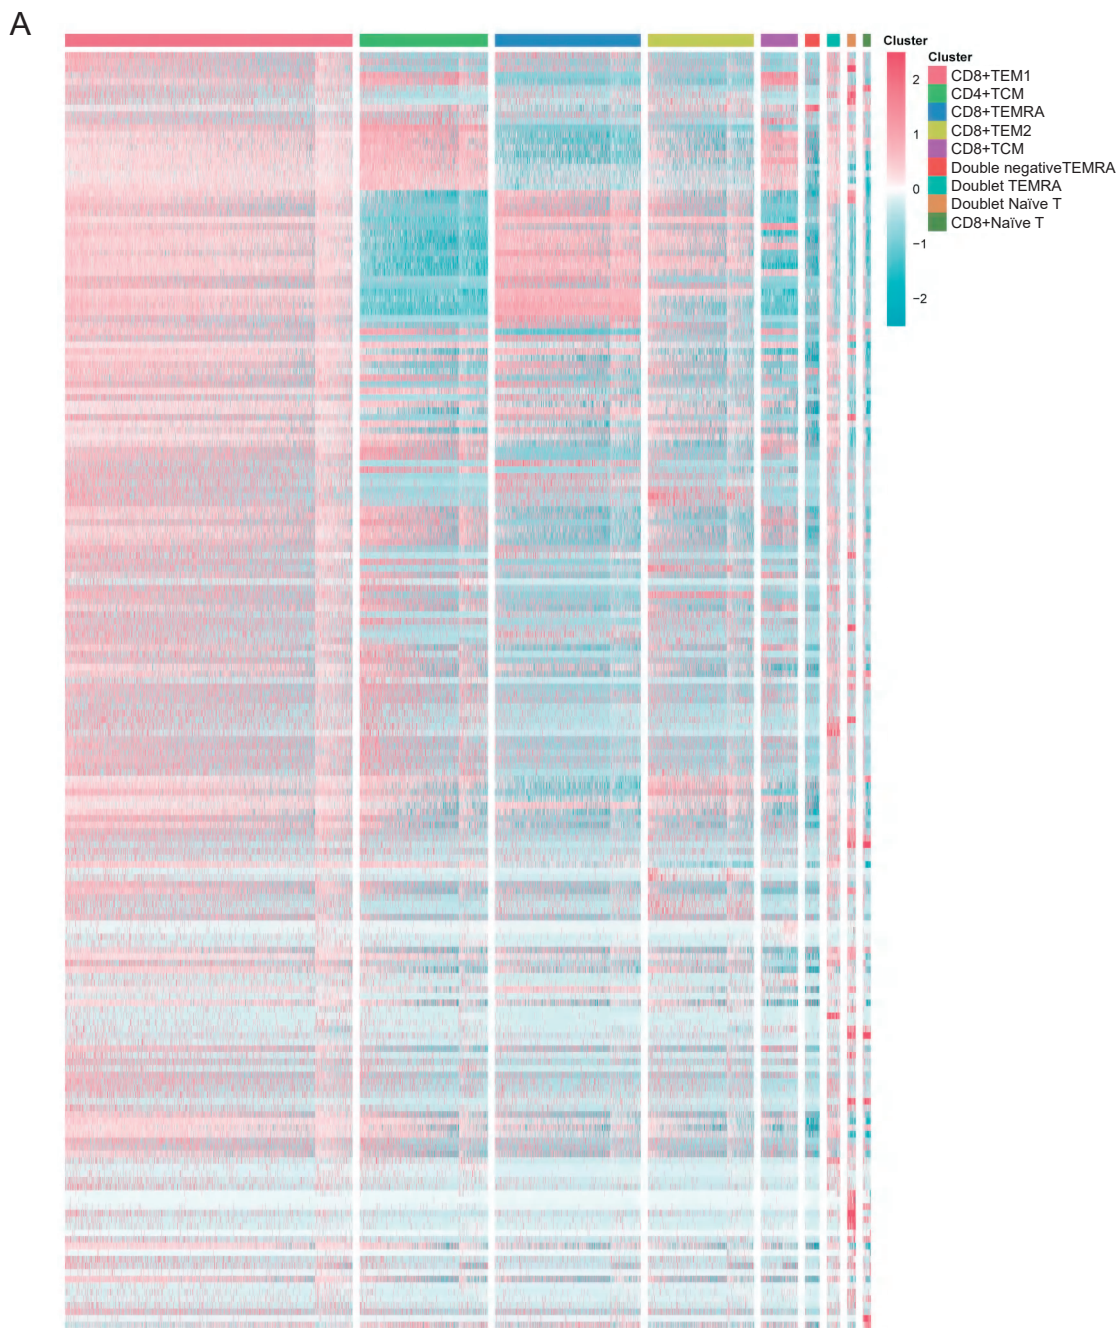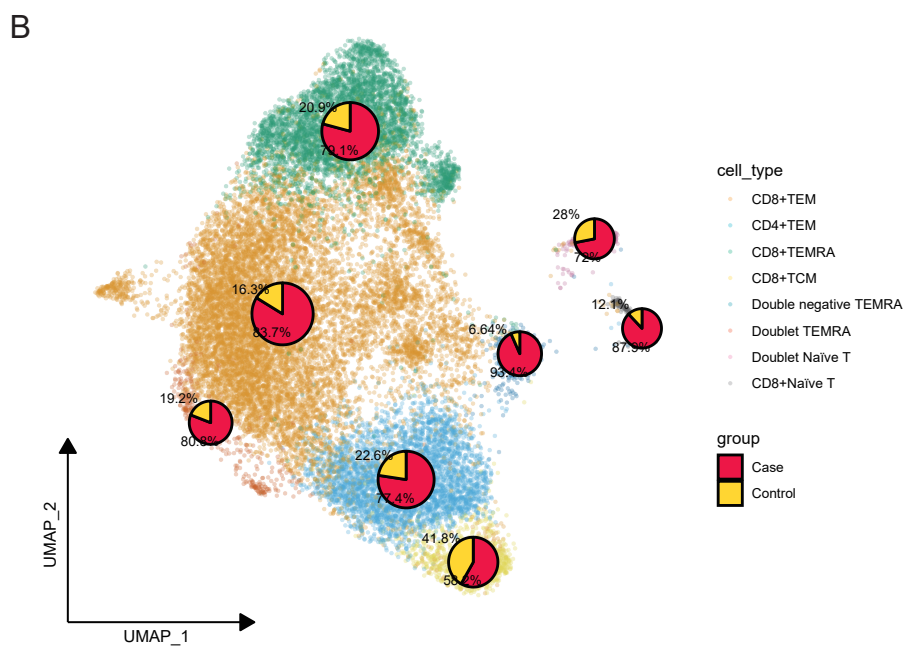

**Fig. S1| The representative genes among different cell clusters, and the proportion of case and control in each cell clusters. A.** Heatmap showed the representative genes of each cluster. **B.** The proportion of case and control in each cell cluster was displayed in Uniform Manifold Approximation and Projection (UMAP).

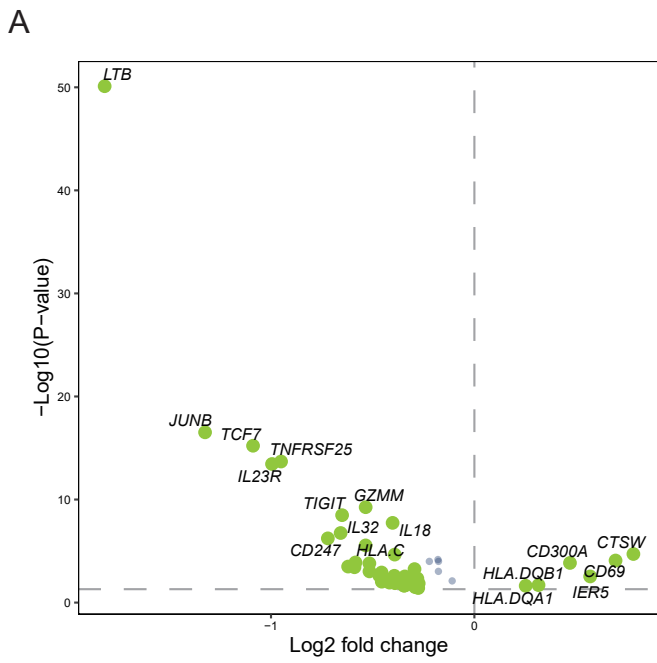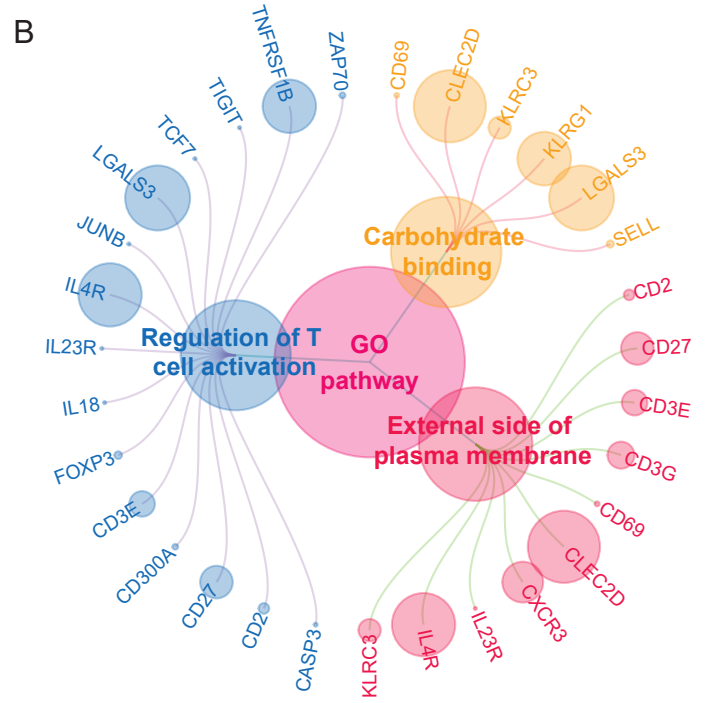

**Fig. S2| DEGs filtration and pathway enrichment analysis.** A. Significant DEGs between case and control groups. B. GO enrichment analysis. The top three GO pathway items were visualized.

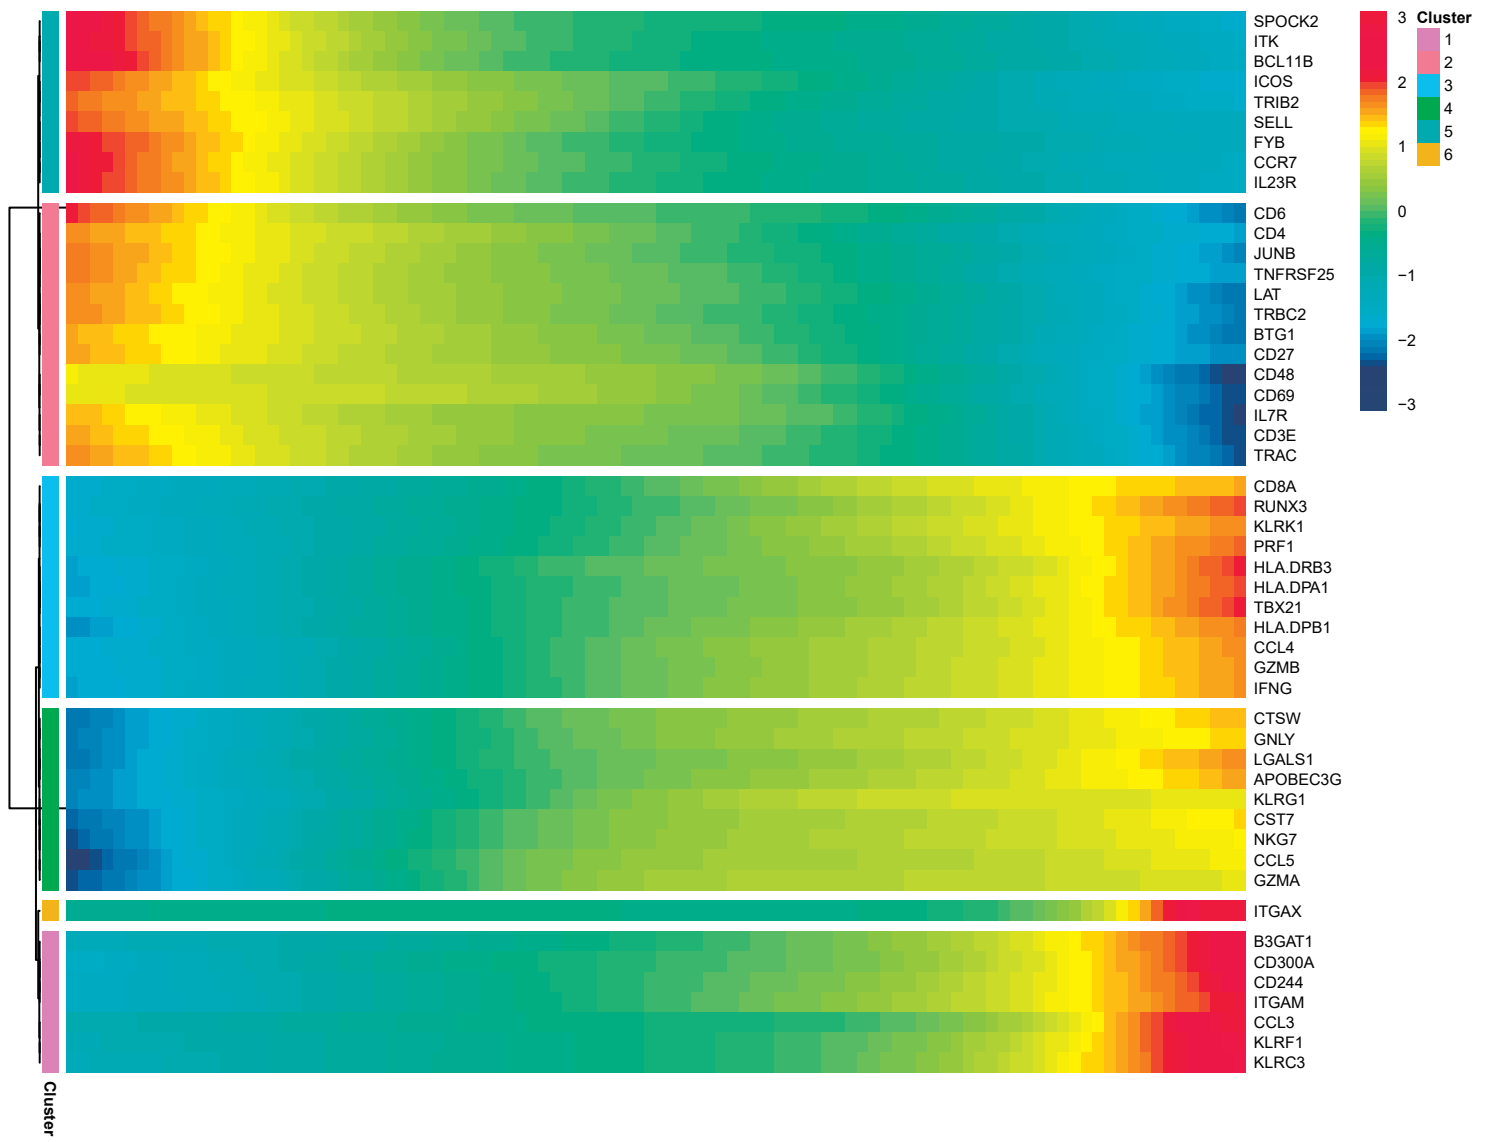

Fig. S3| Branch expression analysis modeling (BEAM analysis).

### Tropic Chemokines

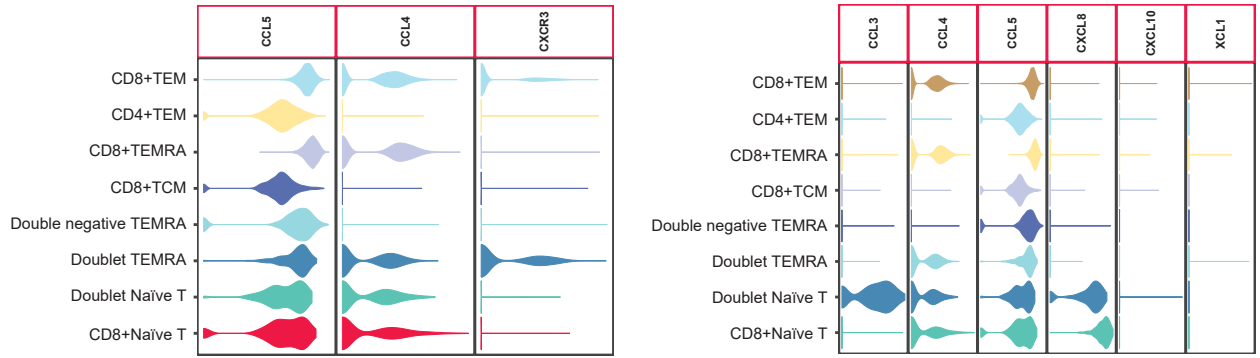

### Classical cytotoxicity activation genes

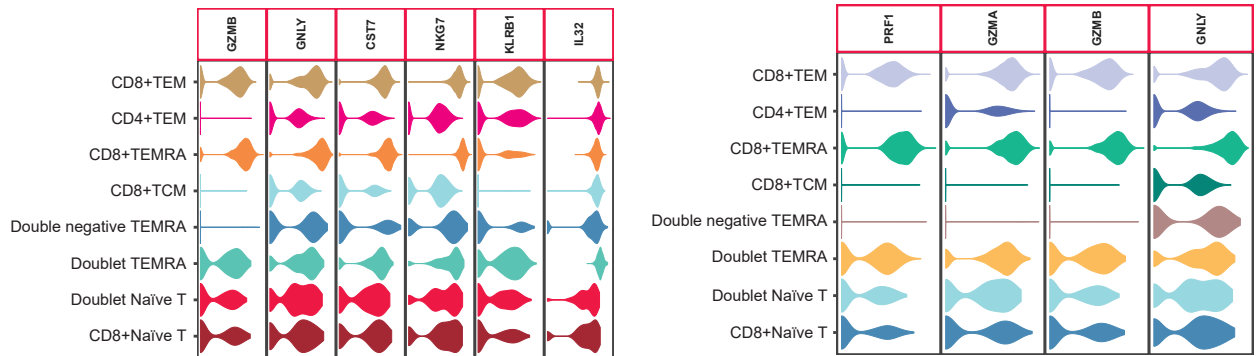

### Downregulated in Exhausted T cells Effector molecules

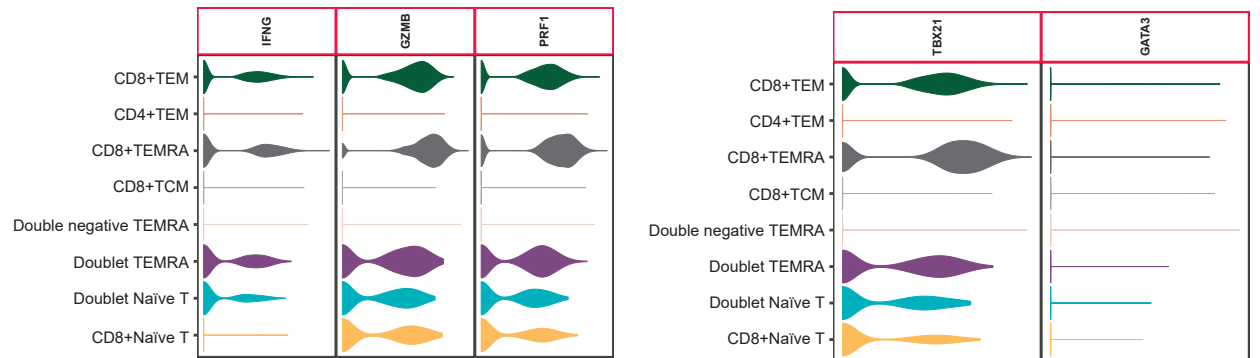

Fig. S4| Violin plot displayed the expression of selected tropic chemokines, classical cytotoxicity activation genes, and downregulated in Exhausted T cells Effector molecules in subtype clusters.

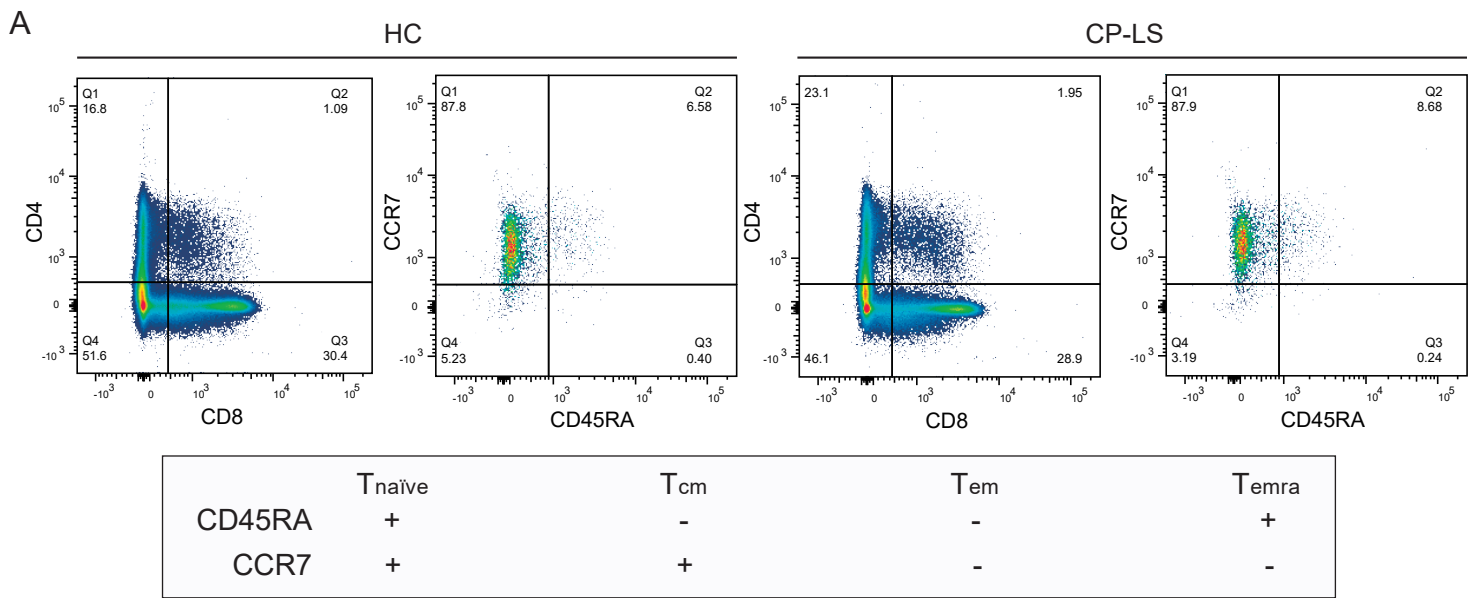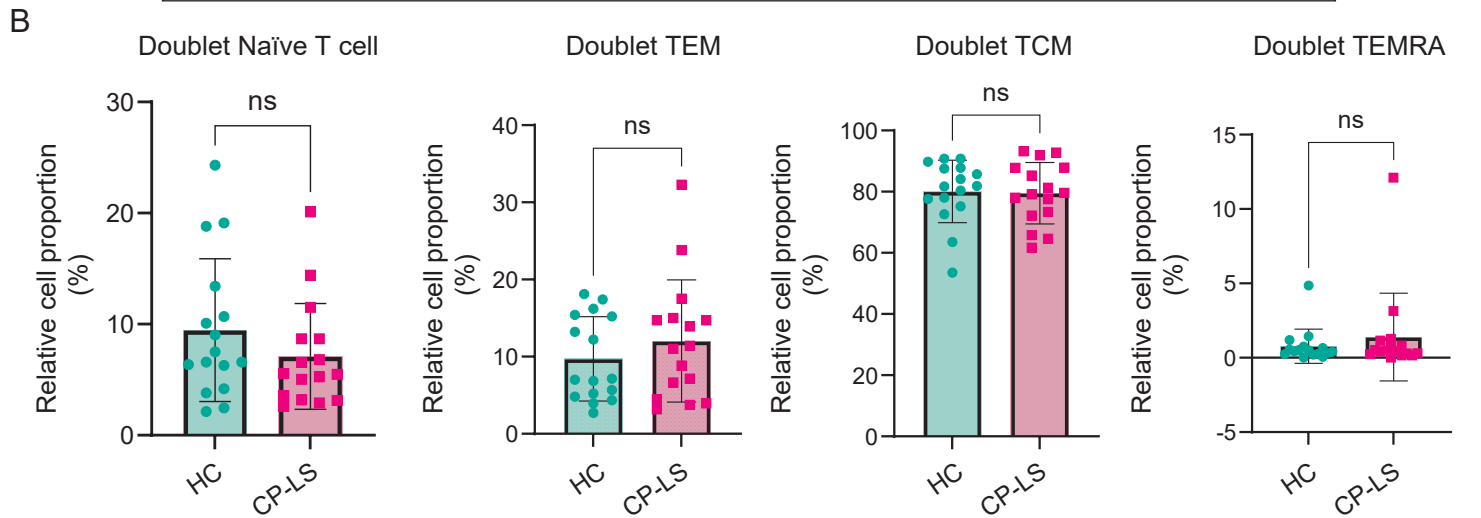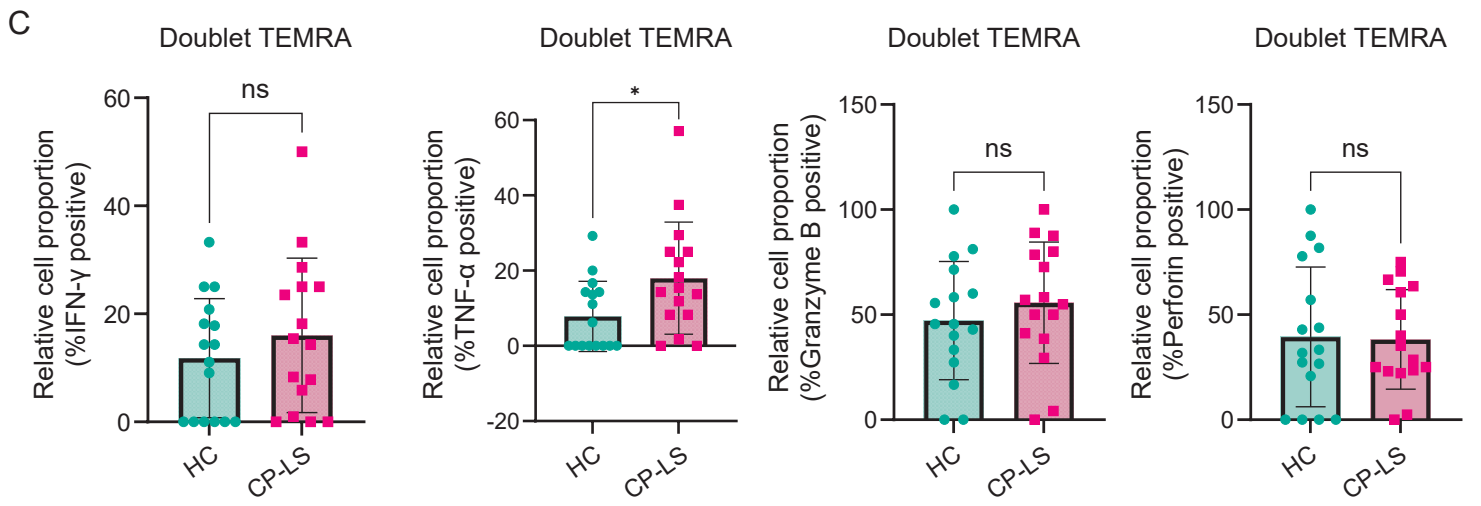

**Fig. S5| Characterization of doublet TEMRA in CP-LS.** PBMCs from patients with CP-LS and HCs were stimulated for 16 hours and analyzed with flow cytometry for intracellular IFN- $\gamma$ , TNF- $\alpha$ , Granzyme B, and Perforin cytokine expression. (A) Representative flow cytometry dot plots of CD45RA and CCR7 expression to identify four CD4<sup>+</sup>CD8<sup>+</sup> T-cell subsets in the PBMCs of a patient with CP-LS (right plot) and a HC (left plot); (B) Percentages of CD45RA<sup>+</sup>CCR7<sup>+</sup> (T<sub>naive</sub>), CD45RA<sup>-</sup>CCR7<sup>+</sup> (T<sub>cm</sub>), CD45RA<sup>-</sup>CCR7<sup>-</sup> (T<sub>em</sub>) and CD45RA<sup>+</sup>CCR7<sup>-</sup> (T<sub>emra</sub>) subsets within the CD4<sup>+</sup>CD8<sup>+</sup>T-cell population in PBMCs of patients with CP-LS (n=16) and HCs (n=16); (C) Percentages of IFN- $\gamma$ <sup>+</sup>, TNF- $\alpha$ <sup>+</sup>, Granzyme B<sup>+</sup>, Perforin<sup>+</sup> doublet TEMRA cells from patients with CP-LS (n=16) and HCs (n=16). **Note:** HC, healthy control; CP-LS, chronic prostatitis-like symptoms; TEM, T Effector Memory; TCM, T Central Memory; TEMRA, T Effector Memory RA. Values of \*p<0.05 was considered significant; ns, not significant.

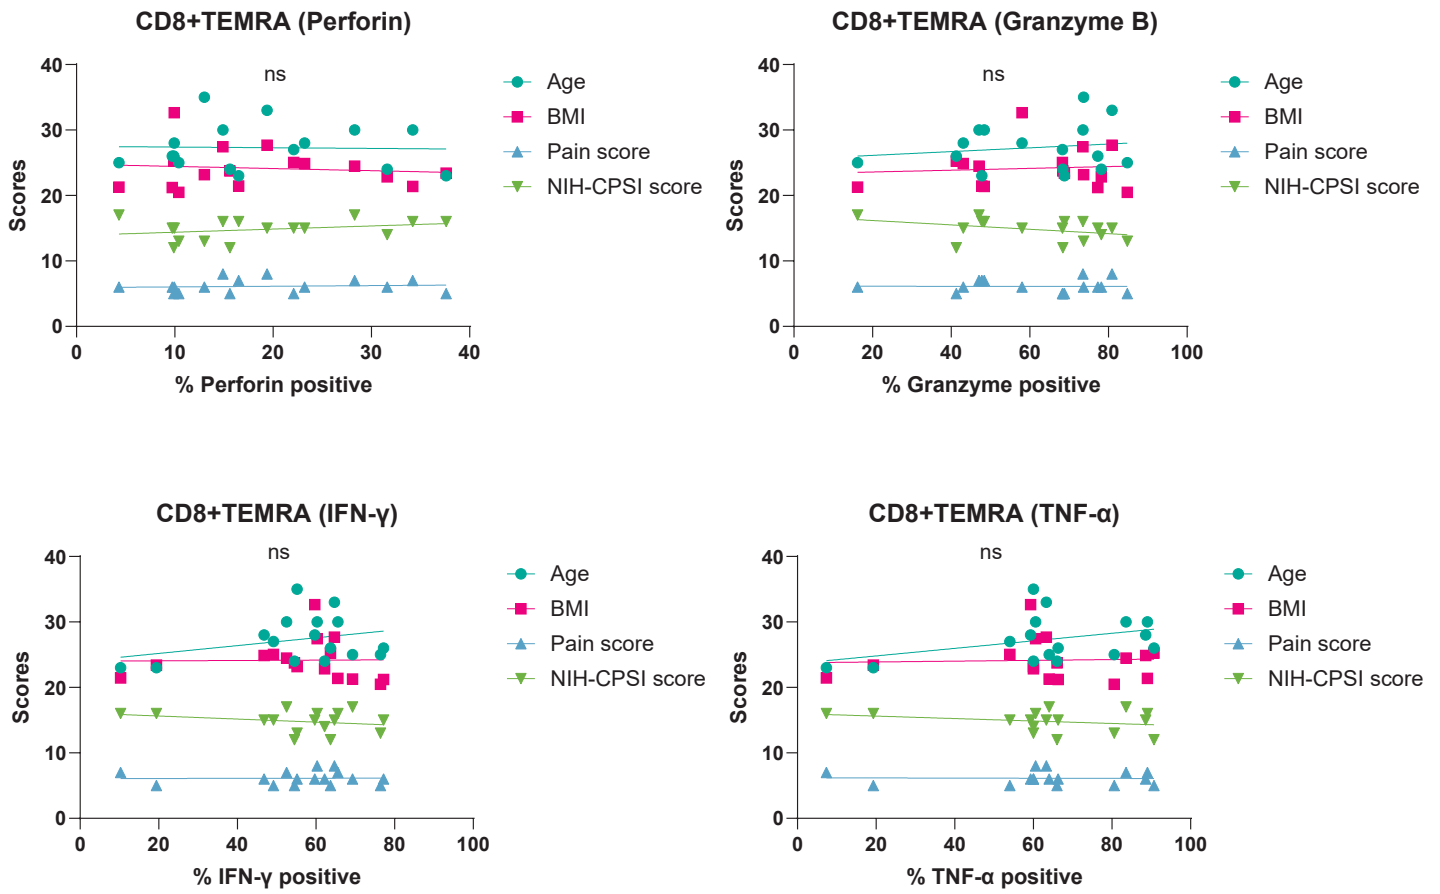

Fig. S6| Correlation between percent of Perforin/Granzyme B/IFN- $\gamma$ /TNF- $\alpha$  positive cells and Age/ BMI/Pain score/NIH-CPSI score. Note: ns, not significant.
